# Supplementary material for: Validation of the French Smoking Cessation Motivation Scale with French Smokers Using a Mobile App for Smoking Cessation
Source: MDPI journal article supplement (doi:10.3390/ejihpe12080082), 2022-08-19
Supplement: s1 [file s1]

**Table S1:** Spanish Smoking Cessation Motivation Scale (S-SCMS)

| Lee atentamente cada una de las siguientes afirmaciones e indica en qué medida se corresponden con tu estado de ánimo actual. Tienes 5 niveles de respuesta: 1-Muy en desacuerdo y 5- Muy acuerdo |                                                                                | Scale |   |   |   |   |
|---------------------------------------------------------------------------------------------------------------------------------------------------------------------------------------------------|--------------------------------------------------------------------------------|-------|---|---|---|---|
|                                                                                                                                                                                                   |                                                                                | 1     | 2 | 3 | 4 | 5 |
| Amot1                                                                                                                                                                                             | Me pregunto si ahora es un buen momento para cambiar.                          |       |   |   |   |   |
| Ext1                                                                                                                                                                                              | Prefiero utilizar mi dinero para disfrutar con mis seres queridos.             |       |   |   |   |   |
| Intro1                                                                                                                                                                                            | Mi familia y/o amigos me presionan para que cambie.                            |       |   |   |   |   |
| Ident1                                                                                                                                                                                            | Quiero mejorar otros aspectos de mi vida                                       |       |   |   |   |   |
| Integ1                                                                                                                                                                                            | Quiero vivir de acuerdo con mis valores y principios.                          |       |   |   |   |   |
| Intrin1                                                                                                                                                                                           | Me siento satisfecho(a) cuando doy un paso hacia el cambio.                    |       |   |   |   |   |
| Amot2                                                                                                                                                                                             | Tengo otras prioridades.                                                       |       |   |   |   |   |
| Ext2                                                                                                                                                                                              | Quiero que mis seres queridos se sientan orgullosos de mí.                     |       |   |   |   |   |
| Intro2                                                                                                                                                                                            | Quiero aliviar las preocupaciones que mis familiares y/o amigos tienen por mí. |       |   |   |   |   |
| Ident2                                                                                                                                                                                            | Me gustaría hacer cambios en mi situación actual.                              |       |   |   |   |   |
| Integ2                                                                                                                                                                                            | Quiero mejorar mi estilo de vida.                                              |       |   |   |   |   |
| Intrin2                                                                                                                                                                                           | Me gusta la idea de conocerme mejor.                                           |       |   |   |   |   |
| Amot3                                                                                                                                                                                             | Necesito un proyecto concreto que me motive a cambiar.                         |       |   |   |   |   |
| Ext3                                                                                                                                                                                              | Quiero pasar más tiempo con mis seres queridos.                                |       |   |   |   |   |
| Intro3                                                                                                                                                                                            | Me sentiría culpable si no hiciera nada para solucionar mis problemas.         |       |   |   |   |   |
| Ident3                                                                                                                                                                                            | Me ayudaría a lograr otros objetivos.                                          |       |   |   |   |   |
| Integ3                                                                                                                                                                                            | Elijo cuidar mejor de mí mismo(a) y de mi salud.                               |       |   |   |   |   |
| Intrin3                                                                                                                                                                                           | Me parece interesante saber que puedo mejorar.                                 |       |   |   |   |   |

The French smoking cessation motivation scale is validated by Luz Bustamante and Pr. Lucia Romo (2020) as part of a 9-step preparation program proposed by Kwit SAS.

**Table S2:** English Smoking Cessation Motivation Scale (E-SCMS)

Motivation is a driving force that pushes you to act. It is like a wind that moves the ship of change. It gives you the direction and strength with which you move forward!

| Carefully read each of the following statements and indicate to what extent they correspond to your current state of mind. You have 5 levels of response: 1- Strongly disagree to 5-Strongly agree |                                                                     | Scale |   |   |   |   |
|----------------------------------------------------------------------------------------------------------------------------------------------------------------------------------------------------|---------------------------------------------------------------------|-------|---|---|---|---|
|                                                                                                                                                                                                    |                                                                     | 1     | 2 | 3 | 4 | 5 |
| Amot1                                                                                                                                                                                              | I'm wondering if it's the right time to change.                     |       |   |   |   |   |
| Ext1                                                                                                                                                                                               | I would rather spend my money on things I enjoy with my loved ones. |       |   |   |   |   |
| Intro1                                                                                                                                                                                             | My loved one's pressure me to change.                               |       |   |   |   |   |
| Ident1                                                                                                                                                                                             | I want to improve other aspects of my life.                         |       |   |   |   |   |
| Integ1                                                                                                                                                                                             | I want to live in accordance with my core beliefs.                  |       |   |   |   |   |
| Intrin1                                                                                                                                                                                            | I am satisfied when I take a step towards change.                   |       |   |   |   |   |
| Amot2                                                                                                                                                                                              | I have other priorities.                                            |       |   |   |   |   |
| Ext2                                                                                                                                                                                               | I want my loved ones to be proud of me                              |       |   |   |   |   |
| Intro2                                                                                                                                                                                             | I want to avoid my loved ones' worries about me.                    |       |   |   |   |   |
| Ident2                                                                                                                                                                                             | I want to make changes to my current situation.                     |       |   |   |   |   |
| Integ2                                                                                                                                                                                             | I want to improve my lifestyle.                                     |       |   |   |   |   |
| Intrin2                                                                                                                                                                                            | I like the idea of getting to know myself better.                   |       |   |   |   |   |
| Amot3                                                                                                                                                                                              | I need a concrete project to encourage me to change.                |       |   |   |   |   |
| Ext3                                                                                                                                                                                               | I want to have more time to spend with my loved ones.               |       |   |   |   |   |
| Intro3                                                                                                                                                                                             | I would feel guilty if I didn't do anything to solve my problems.   |       |   |   |   |   |
| Ident3                                                                                                                                                                                             | It would help me to achieve other goals.                            |       |   |   |   |   |
| Integ3                                                                                                                                                                                             | I choose to take better care of myself and my health.               |       |   |   |   |   |
| Intrin3                                                                                                                                                                                            | I find it interesting to learn that I can improve.                  |       |   |   |   |   |

The French smoking cessation motivation scale is validated by Luz Bustamante and Pr. Lucia Romo (2020) as part of a 9-step preparation program proposed by Kwit SAS.
